# Supplementary material
Source: MDPI journal article supplement (https://www.mdpi.com/2071-1050/12/24/10233)
Supplement: s1 [file s1]

**Supplementary Material:**

The spatial and temporal patterns and dynamic characteristics of ecosystem service values from empirical models.

2000

(a)

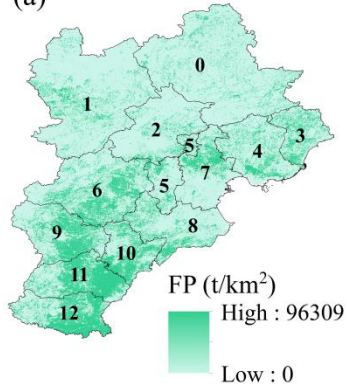

2014

(b)

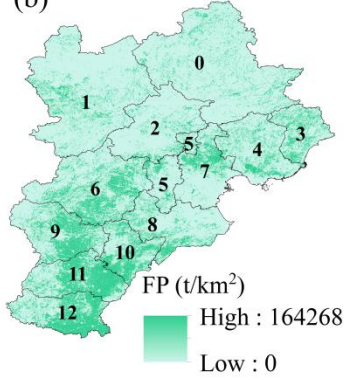

Change 2000-2014

(c)

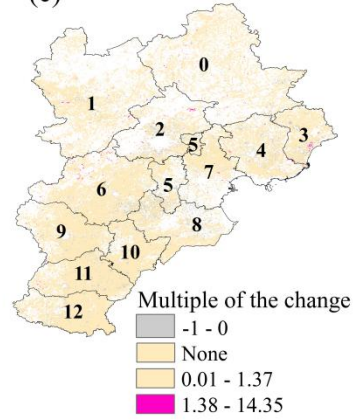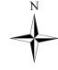

(d)

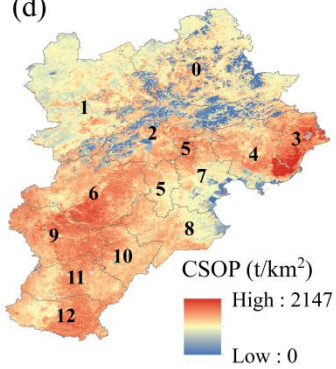

(e)

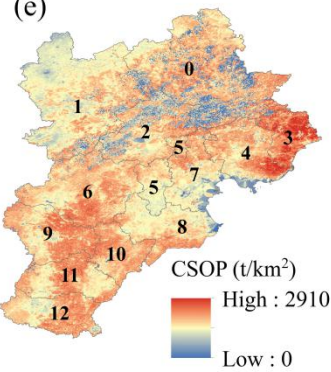

(f)

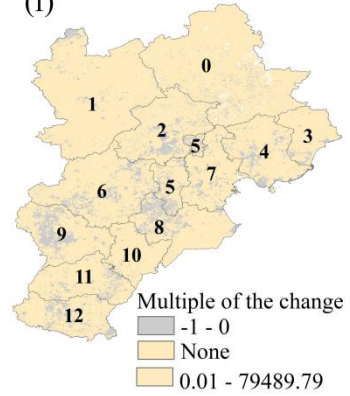

(g)

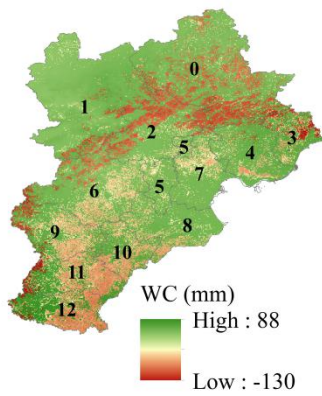

(h)

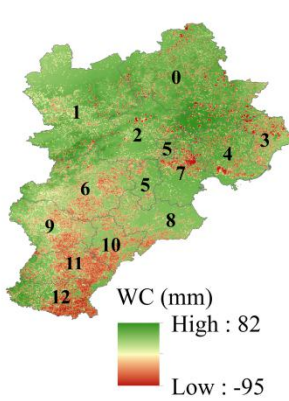

(i)

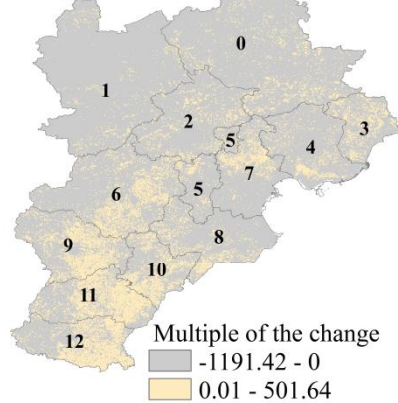

(j)

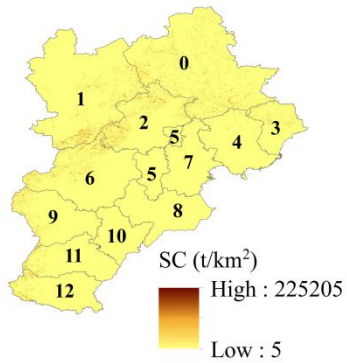

(k)

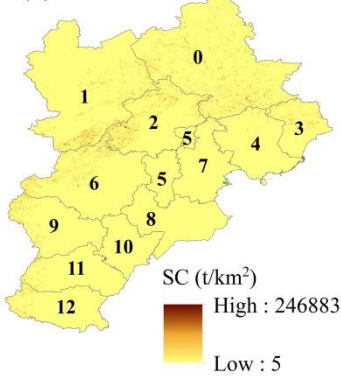

(l)

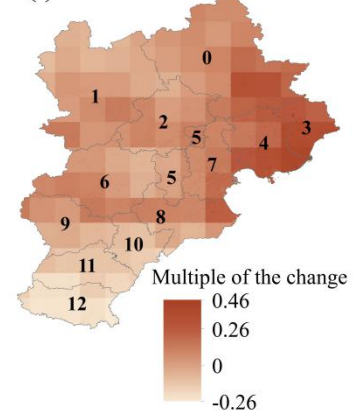

0 280 560 Kilometers

**Figure S1.** Spatial and temporal patterns and dynamic characteristics of ecosystem service values from empirical models for the Beijing, Tianjin, and Hebei (BTH) region in 2000–2014. FP denotes food production; CSOP means carbon sequestration and oxygen production; WC is water conservation, and SC is soil conservation. The numbers in maps represent each district (0, Chengde; 1, Zhangjiakou; 2, Beijing; 3, Qinhuangdao; 4, Tangshan; 5, Langfang; 6, Baoding; 7, Tianjin; 8, Cangzhou; 9, Shijiazhuang; 10, Hengshui; 11, Xingtai; 12, Handan).
